# Supplementary material for: Phosphoproteome Analysis Reveals the Molecular Mechanisms Underlying Deoxynivalenol-Induced Intestinal Toxicity in IPEC-J2 Cells
Source: MDPI journal article supplement (doi:10.3390/toxins8100270), 2016-09-22
Supplement: s1 [file s1]

# Supplementary Materials: Phosphoproteome Analysis Reveals the Molecular Mechanisms Underlying Deoxynivalenol-Induced Intestinal Toxicity in IPEC-J2 Cells

Zhi-Qi Zhang, Song-Bo Wang, Rui-Guo Wang, Wei Zhang, Pei-Long Wang and Xiao-Ou Su

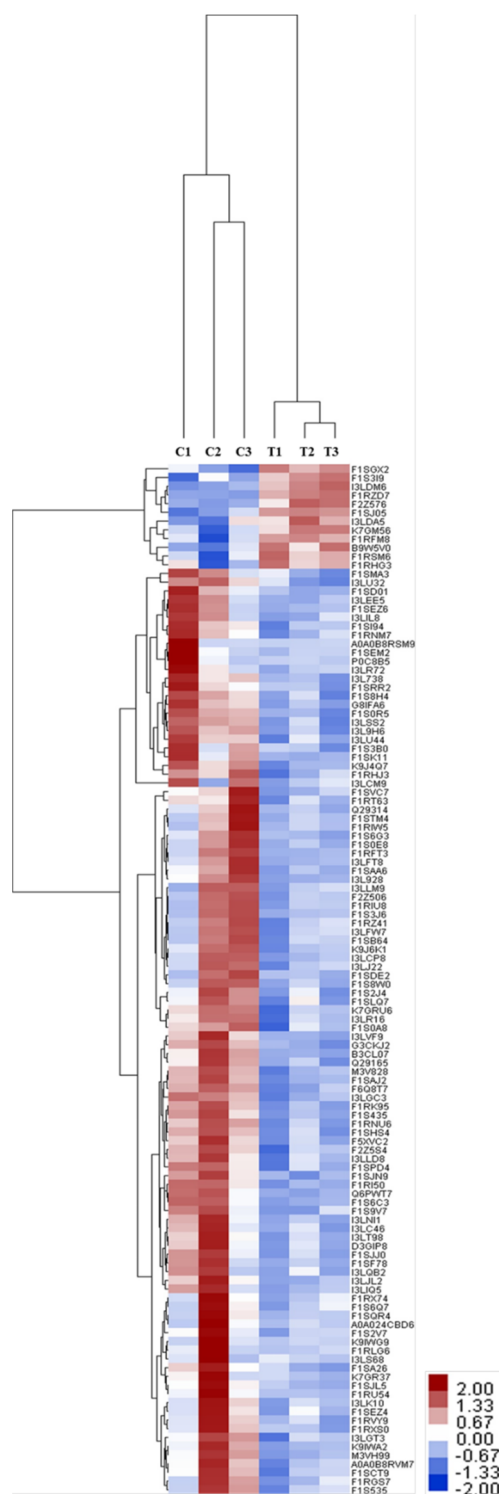

**Figure S1.** Cluster heat map of differentially expressed phosphoproteins regulated by DON exposure in differentiated IPEC-J2 cells. Each column represents a group from three biological replicates (C: Control; T: 20 μM DON). The color codes indicate the average values of the biological replicates.
